# Supplementary material for: A theoretical study on spontaneous dipole orientation in ice structures
Source: Royal Society of Chemistry journal article supplement (doi:10.1039/d2cp00360k), 2022-01-01
Supplement: d2cp00360k1.pdf [file d2cp00360k1.pdf]

## Supporting Information

### A theoretical study on spontaneous dipole alignment in ice structures

S. Rasoul Hashemi<sup>1</sup>, Martin R. S. McCoustra<sup>2</sup>, Helen J. Fraser<sup>3</sup>, and Gunnar Nyman<sup>1,\*</sup>

<sup>1</sup> Department of Chemistry and Molecular Biology, University of Gothenburg, 41296 Gothenburg, Sweden

<sup>2</sup> Institute of Chemical Sciences, Heriot-Watt University, Edinburgh, EH14 4AS, UK

<sup>3</sup> School of Physical Sciences, The Open University, Walton Hall, Milton Keynes MK7 6AA, UK

\* Corresponding author; Email:nyman@chem.gu.se

Table S1:  $\langle\mu_x\rangle$ ,  $\langle\mu_y\rangle$  and  $\langle\mu_z\rangle$  and the corresponding standard errors of the mean (SEM) at  $T_g = 150K$ .

| $T_s$<br>(K) | $\langle\mu_x\rangle$<br>(eÅ) | $SEM_{\langle\mu_x\rangle}$ | $\langle\mu_y\rangle$<br>(eÅ) | $SEM_{\langle\mu_y\rangle}$ | $\langle\mu_z\rangle$<br>(eÅ) | $SEM_{\langle\mu_z\rangle}$ |
|--------------|-------------------------------|-----------------------------|-------------------------------|-----------------------------|-------------------------------|-----------------------------|
| 10           | -0.00019                      | 0.00405                     | 0.00394                       | 0.00407                     | -0.01212                      | 0.00312                     |
| 20           | 0.00095                       | 0.00674                     | 0.00227                       | 0.00570                     | -0.01369                      | 0.00180                     |
| 30           | -0.00002                      | 0.00301                     | -0.00092                      | 0.00249                     | -0.01219                      | 0.00209                     |
| 40           | 0.00114                       | 0.00411                     | -0.00056                      | 0.00516                     | -0.01192                      | 0.00240                     |
| 50           | 0.00398                       | 0.00353                     | 0.00128                       | 0.00245                     | -0.01484                      | 0.00300                     |
| 60           | 0.00415                       | 0.00525                     | -0.00101                      | 0.00443                     | -0.01448                      | 0.00249                     |
| 70           | 0.00820                       | 0.00436                     | -0.00231                      | 0.00616                     | -0.00710                      | 0.00242                     |
| 80           | 0.00162                       | 0.00255                     | 0.00224                       | 0.00220                     | -0.00811                      | 0.00192                     |
| 90           | 0.00054                       | 0.00429                     | -0.00184                      | 0.00584                     | -0.00252                      | 0.00285                     |
| 100          | -0.00427                      | 0.00537                     | 0.00202                       | 0.00360                     | -0.00785                      | 0.00221                     |
| 110          | -0.00859                      | 0.00486                     | -0.00010                      | 0.00411                     | -0.00581                      | 0.00368                     |
| 120          | -0.00112                      | 0.00412                     | -0.00090                      | 0.00434                     | -0.00190                      | 0.00182                     |
| 130          | -0.00151                      | 0.00242                     | 0.00295                       | 0.00247                     | 0.00276                       | 0.00182                     |
| 140          | 0.00099                       | 0.00533                     | 0.00667                       | 0.00206                     | 0.00670                       | 0.00383                     |

Table S2:  $\langle\mu_x\rangle$ ,  $\langle\mu_y\rangle$  and  $\langle\mu_z\rangle$  and the corresponding standard errors of the mean (SEM) at  $T_g = 300K$ .

| $T_s$<br>(K) | $\langle\mu_x\rangle$<br>(eÅ) | $SEM_{\langle\mu_x\rangle}$ | $\langle\mu_y\rangle$<br>(eÅ) | $SEM_{\langle\mu_y\rangle}$ | $\langle\mu_z\rangle$<br>(eÅ) | $SEM_{\langle\mu_z\rangle}$ |
|--------------|-------------------------------|-----------------------------|-------------------------------|-----------------------------|-------------------------------|-----------------------------|
| 10           | 0.00279                       | 0.00279                     | 0.00190                       | 0.00308                     | -0.02179                      | 0.00186                     |
| 20           | -0.00828                      | 0.00439                     | -0.00462                      | 0.00449                     | -0.01389                      | 0.00245                     |
| 30           | -0.00223                      | 0.00232                     | -0.00347                      | 0.00222                     | -0.01442                      | 0.00126                     |
| 40           | -0.00576                      | 0.00529                     | -0.00754                      | 0.00677                     | -0.01234                      | 0.00181                     |
| 50           | 0.00649                       | 0.00523                     | -0.00038                      | 0.00540                     | -0.00851                      | 0.00286                     |
| 60           | -0.01037                      | 0.00590                     | -0.00575                      | 0.00432                     | -0.00996                      | 0.00311                     |
| 70           | -0.00740                      | 0.00283                     | -0.00096                      | 0.00584                     | -0.00755                      | 0.00444                     |
| 80           | -0.00299                      | 0.00258                     | -0.00048                      | 0.00306                     | -0.00509                      | 0.00183                     |
| 90           | -0.00008                      | 0.00321                     | -0.00156                      | 0.00544                     | -0.00511                      | 0.00219                     |
| 100          | 0.00420                       | 0.00573                     | -0.00134                      | 0.00427                     | -0.00665                      | 0.00304                     |
| 110          | -0.00029                      | 0.00561                     | -0.00200                      | 0.00451                     | -0.00379                      | 0.00213                     |
| 120          | -0.00088                      | 0.00569                     | -0.00160                      | 0.00661                     | -0.00002                      | 0.00310                     |
| 130          | -0.00189                      | 0.00348                     | 0.00307                       | 0.00316                     | -0.00121                      | 0.00139                     |
| 140          | 0.00904                       | 0.00815                     | -0.00510                      | 0.00455                     | -0.00128                      | 0.00335                     |

Table S3:  $\langle\mu_z\rangle$ ,  $\langle\mu_z\rangle/\mu$ ,  $E_{cal}$ ,  $d$  and  $V_s$  and the corresponding standard errors of the mean (SEM) at  $T_g = 150K$ .

| $T_s$<br>(K) | $\langle\mu_z\rangle$<br>(eÅ) | $SEM_{\langle\mu_z\rangle}$ | $\langle\mu_z\rangle/\mu$ | $E_{cal}$<br>( $\times 10^{+8} Vm^{-1}$ ) | $d$<br>(Å) | $SEM_d$ | $V_s$<br>(V) | $SEM_{V_s}$ |
|--------------|-------------------------------|-----------------------------|---------------------------|-------------------------------------------|------------|---------|--------------|-------------|
| 10           | -0.01212                      | 0.00312                     | -0.02525                  | -6.89                                     | 43.7199    | 2.4489  | -3.0559      | 0.7773      |
| 20           | -0.01369                      | 0.00180                     | -0.02853                  | -7.79                                     | 41.5309    | 1.8680  | -3.2188      | 0.4132      |
| 30           | -0.01219                      | 0.00209                     | -0.02540                  | -6.93                                     | 40.9429    | 1.3235  | -2.7630      | 0.4411      |
| 40           | -0.01192                      | 0.00240                     | -0.02483                  | -6.78                                     | 39.9724    | 1.9057  | -2.5880      | 0.5258      |
| 50           | -0.01484                      | 0.00300                     | -0.03091                  | -8.44                                     | 41.7626    | 1.7620  | -3.4220      | 0.7152      |
| 60           | -0.01448                      | 0.00249                     | -0.03017                  | -8.23                                     | 38.9102    | 1.5497  | -3.0648      | 0.5180      |
| 70           | -0.00710                      | 0.00242                     | -0.01479                  | -4.04                                     | 34.6209    | 1.1685  | -1.3731      | 0.4987      |
| 80           | -0.00811                      | 0.00192                     | -0.01691                  | -4.61                                     | 37.0365    | 1.2818  | -1.7749      | 0.4281      |
| 90           | -0.00252                      | 0.00285                     | -0.00526                  | -1.44                                     | 37.1652    | 1.7803  | -0.4102      | 0.6147      |
| 100          | -0.00785                      | 0.00221                     | -0.01637                  | -4.47                                     | 37.1326    | 1.8506  | -1.6003      | 0.4387      |
| 110          | -0.00581                      | 0.00368                     | -0.01210                  | -3.30                                     | 35.4604    | 2.3107  | -1.3720      | 0.8134      |
| 120          | -0.00190                      | 0.00182                     | -0.00397                  | -1.08                                     | 35.0269    | 1.5527  | -0.3740      | 0.3864      |
| 130          | 0.00276                       | 0.00182                     | 0.00574                   | 1.57                                      | 32.2863    | 0.9403  | 0.6721       | 0.2854      |
| 140          | 0.00670                       | 0.00383                     | 0.01396                   | 3.81                                      | 29.8822    | 1.5673  | 1.2578       | 0.7015      |

Table S4:  $\langle\mu_z\rangle$ ,  $\langle\mu_z\rangle/\mu$ ,  $E_{cal}$ ,  $d$  and  $V_s$  and the corresponding standard errors of the mean (SEM) at  $T_g = 300K$ .

| $T_s$<br>(K) | $\langle\mu_z\rangle$<br>(eÅ) | $SEM_{\langle\mu_z\rangle}$ | $\langle\mu_z\rangle/\mu$ | $E_{cal}$<br>( $\times 10^{+8} Vm^{-1}$ ) | $d$<br>(Å) | $SEM_d$ | $V_s$<br>(V) | $SEM_{V_s}$ |
|--------------|-------------------------------|-----------------------------|---------------------------|-------------------------------------------|------------|---------|--------------|-------------|
| 10           | -0.02179                      | 0.00186                     | -0.04540                  | -12.39                                    | 39.3780    | 2.1509  | -4.9724      | 0.5493      |
| 20           | -0.01389                      | 0.00245                     | -0.02893                  | -7.90                                     | 39.0883    | 1.4890  | -3.0890      | 0.5750      |
| 30           | -0.01442                      | 0.00126                     | -0.03004                  | -8.20                                     | 34.6728    | 1.2078  | -2.8315      | 0.2835      |
| 40           | -0.01234                      | 0.00181                     | -0.02572                  | -7.02                                     | 35.1525    | 1.6598  | -2.5738      | 0.4548      |
| 50           | -0.00851                      | 0.00286                     | -0.01774                  | -4.84                                     | 33.8206    | 1.8568  | -1.4980      | 0.5583      |
| 60           | -0.00996                      | 0.00311                     | -0.02076                  | -5.67                                     | 33.2558    | 1.5506  | -1.9240      | 0.6029      |
| 70           | -0.00755                      | 0.00444                     | -0.01574                  | -4.30                                     | 32.3657    | 1.8175  | -1.3323      | 0.8428      |
| 80           | -0.00509                      | 0.00183                     | -0.01060                  | -2.89                                     | 33.7683    | 0.9003  | -1.0132      | 0.3608      |
| 90           | -0.00511                      | 0.00219                     | -0.01065                  | -2.91                                     | 30.2608    | 1.7188  | -0.8355      | 0.3806      |
| 100          | -0.00665                      | 0.00304                     | -0.01387                  | -3.78                                     | 31.2509    | 1.8551  | -1.0053      | 0.5761      |
| 110          | -0.00379                      | 0.00213                     | -0.00789                  | -2.15                                     | 30.0533    | 0.8136  | -0.6695      | 0.3873      |
| 120          | -0.00002                      | 0.00310                     | -0.00004                  | -0.01                                     | 30.6580    | 1.4151  | 0.0280       | 0.5319      |
| 130          | -0.00121                      | 0.00139                     | -0.00251                  | -0.69                                     | 30.1717    | 0.7288  | -0.2437      | 0.2578      |
| 140          | -0.00128                      | 0.00335                     | -0.00268                  | -0.73                                     | 29.5324    | 0.9654  | -0.2363      | 0.6131      |

Table S5: Results for Layer 1 at  $T_g = 150K$ .

| $T_s$<br>(K) | $\langle\mu_z\rangle$<br>(eÅ) | $SEM_{\langle\mu_z\rangle}$ | $\langle\mu_z\rangle/\mu$ | $E_{cal}$<br>( $\times 10^{+8} Vm^{-1}$ ) | $N_W$ | $SEM_{N_W}$ | $d_l$<br>(Å) | $SEM_{d_l}$ | $V(d_l)$<br>(V) | $SEM_{V(d_l)}$ |
|--------------|-------------------------------|-----------------------------|---------------------------|-------------------------------------------|-------|-------------|--------------|-------------|-----------------|----------------|
| 10           | 0.00173                       | 0.00349                     | 0.00360                   | 0.98                                      | 149   | 8           | 7.287        | 0.408       | 0.08417         | 0.14173        |
| 20           | -0.00546                      | 0.00270                     | -0.01138                  | -3.11                                     | 165   | 7           | 6.922        | 0.311       | -0.22151        | 0.10725        |
| 30           | -0.00246                      | 0.00146                     | -0.00513                  | -1.40                                     | 162   | 5           | 6.824        | 0.221       | -0.11210        | 0.05117        |
| 40           | -0.00110                      | 0.00194                     | -0.00229                  | -0.62                                     | 162   | 7           | 6.662        | 0.318       | -0.04700        | 0.07333        |
| 50           | -0.00295                      | 0.00305                     | -0.00615                  | -1.68                                     | 166   | 7           | 6.960        | 0.294       | -0.09861        | 0.11837        |
| 60           | -0.00415                      | 0.00356                     | -0.00864                  | -2.36                                     | 174   | 6           | 6.485        | 0.258       | -0.15663        | 0.12468        |
| 70           | 0.00641                       | 0.00255                     | 0.01336                   | 3.65                                      | 172   | 4           | 5.770        | 0.195       | 0.21362         | 0.08855        |
| 80           | 0.00375                       | 0.00168                     | 0.00782                   | 2.13                                      | 167   | 4           | 6.173        | 0.214       | 0.11279         | 0.05907        |
| 90           | 0.00833                       | 0.00237                     | 0.01735                   | 4.74                                      | 158   | 6           | 6.194        | 0.297       | 0.27528         | 0.08206        |
| 100          | 0.00339                       | 0.00165                     | 0.00706                   | 1.93                                      | 168   | 5           | 6.189        | 0.308       | 0.11779         | 0.05368        |
| 110          | 0.00615                       | 0.00321                     | 0.01281                   | 3.50                                      | 170   | 4           | 5.910        | 0.385       | 0.15419         | 0.09283        |
| 120          | 0.00814                       | 0.00287                     | 0.01697                   | 4.63                                      | 155   | 8           | 5.838        | 0.259       | 0.25347         | 0.08631        |
| 130          | 0.01146                       | 0.00197                     | 0.02388                   | 6.52                                      | 166   | 3           | 5.381        | 0.157       | 0.33180         | 0.06092        |
| 140          | 0.01218                       | 0.00305                     | 0.02538                   | 6.93                                      | 172   | 5           | 4.980        | 0.261       | 0.34300         | 0.08922        |

Table S6: Results for Layer 2 at  $T_g = 150K$ .

| $T_s$<br>(K) | $\langle\mu_z\rangle$<br>(eÅ) | $SEM_{\langle\mu_z\rangle}$ | $\langle\mu_z\rangle/\mu$ | $E_{cal}$<br>( $\times 10^{+8} Vm^{-1}$ ) | $N_W$ | $SEM_{N_W}$ | $d_l$<br>(Å) | $SEM_{d_l}$ | $V(d_l)$<br>(V) | $SEM_{V(d_l)}$ |
|--------------|-------------------------------|-----------------------------|---------------------------|-------------------------------------------|-------|-------------|--------------|-------------|-----------------|----------------|
| 10           | -0.01460                      | 0.00699                     | -0.03042                  | -8.30                                     | 76    | 7           | 7.287        | 0.408       | -0.50147        | 0.25042        |
| 20           | -0.01941                      | 0.00512                     | -0.04045                  | -11.04                                    | 97    | 7           | 6.922        | 0.311       | -0.72950        | 0.18753        |
| 30           | -0.01946                      | 0.00165                     | -0.04055                  | -11.07                                    | 88    | 3           | 6.824        | 0.221       | -0.74915        | 0.05751        |
| 40           | -0.01830                      | 0.00578                     | -0.03813                  | -10.41                                    | 86    | 6           | 6.662        | 0.318       | -0.64204        | 0.21520        |
| 50           | -0.02313                      | 0.00405                     | -0.04819                  | -13.15                                    | 94    | 6           | 6.960        | 0.294       | -0.91990        | 0.17711        |
| 60           | -0.02528                      | 0.00524                     | -0.05267                  | -14.37                                    | 78    | 8           | 6.485        | 0.258       | -0.87807        | 0.18630        |
| 70           | -0.01489                      | 0.00431                     | -0.03102                  | -8.47                                     | 94    | 5           | 5.770        | 5.770       | -0.47396        | 0.13076        |
| 80           | -0.01454                      | 0.00284                     | -0.03030                  | -8.27                                     | 95    | 3           | 6.173        | 6.173       | -0.52240        | 0.10719        |
| 90           | -0.01063                      | 0.00504                     | -0.02215                  | -6.05                                     | 93    | 5           | 6.194        | 0.297       | -0.32700        | 0.18260        |
| 100          | -0.01489                      | 0.00409                     | -0.03102                  | -8.47                                     | 94    | 7           | 6.189        | 0.308       | -0.51849        | 0.13844        |
| 110          | -0.01985                      | 0.00544                     | -0.04137                  | -11.29                                    | 89    | 6           | 5.910        | 0.385       | -0.64147        | 0.18652        |
| 120          | -0.01245                      | 0.00368                     | -0.02594                  | -7.08                                     | 101   | 5           | 5.838        | 0.259       | -0.40526        | 0.11531        |
| 130          | -0.00875                      | 0.00276                     | -0.01822                  | -4.97                                     | 95    | 3           | 5.381        | 0.157       | -0.23471        | 0.08408        |
| 140          | 0.00408                       | 0.00467                     | 0.00849                   | 2.32                                      | 101   | 4           | 4.980        | 0.261       | 0.12825         | 0.14131        |

Table S7: Results for Layer 3 at  $T_g = 150K$ .

| $T_s$<br>(K) | $\langle\mu_z\rangle$<br>(eÅ) | $SEM_{\langle\mu_z\rangle}$ | $\langle\mu_z\rangle/\mu$ | $E_{cal}$<br>( $\times 10^{+8} Vm^{-1}$ ) | $N_W$ | $SEM_{N_W}$ | $d_l$<br>(Å) | $SEM_{d_l}$ | $V(d_l)$<br>(V) | $SEM_{V(d_l)}$ |
|--------------|-------------------------------|-----------------------------|---------------------------|-------------------------------------------|-------|-------------|--------------|-------------|-----------------|----------------|
| 10           | -0.00685                      | 0.00733                     | -0.01427                  | -3.90                                     | 74    | 5           | 7.287        | 0.408       | -0.28946        | 0.28474        |
| 20           | -0.01204                      | 0.00521                     | -0.02510                  | -6.85                                     | 80    | 6           | 6.922        | 0.311       | -0.47540        | 0.20762        |
| 30           | -0.01223                      | 0.00368                     | -0.02548                  | -6.95                                     | 74    | 2           | 6.824        | 0.221       | -0.45225        | 0.14593        |
| 40           | -0.01697                      | 0.00416                     | -0.03536                  | -9.65                                     | 73    | 5           | 6.662        | 0.318       | -0.64397        | 0.15662        |
| 50           | -0.01434                      | 0.00631                     | -0.02988                  | -8.15                                     | 72    | 5           | 6.960        | 0.294       | -0.52954        | 0.24347        |
| 60           | -0.01555                      | 0.00490                     | -0.03240                  | -8.84                                     | 75    | 3           | 6.485        | 0.258       | -0.53564        | 0.16700        |
| 70           | -0.00143                      | 0.00839                     | -0.00299                  | -0.81                                     | 70    | 5           | 5.770        | 5.770       | -0.01907        | 0.28876        |
| 80           | -0.01607                      | 0.00347                     | -0.03348                  | -9.14                                     | 81    | 2           | 6.173        | 6.173       | -0.58773        | 0.13211        |
| 90           | -0.00052                      | 0.00437                     | -0.00108                  | -0.29                                     | 88    | 4           | 6.194        | 0.297       | 0.00619         | 0.15474        |
| 100          | -0.01006                      | 0.00498                     | -0.02096                  | -5.72                                     | 86    | 5           | 6.189        | 0.308       | -0.32386        | 0.18361        |
| 110          | -0.00568                      | 0.00594                     | -0.01183                  | -3.23                                     | 82    | 4           | 5.910        | 0.385       | -0.23321        | 0.22167        |
| 120          | -0.00569                      | 0.00391                     | -0.01186                  | -3.24                                     | 87    | 3           | 5.838        | 0.259       | -0.20818        | 0.13929        |
| 130          | 0.00161                       | 0.00395                     | 0.00336                   | 0.92                                      | 83    | 2           | 5.381        | 0.157       | 0.06353         | 0.14177        |
| 140          | -0.00382                      | 0.00890                     | -0.00797                  | -0.22                                     | 83    | 3           | 4.980        | 0.261       | -0.05528        | 0.27518        |

Table S8: Results for Layer 4 at  $T_g = 150K$ .

| $T_s$<br>(K) | $\langle\mu_z\rangle$<br>(eÅ) | $SEM_{\langle\mu_z\rangle}$ | $\langle\mu_z\rangle/\mu$ | $E_{cal}$<br>( $\times 10^{+8} Vm^{-1}$ ) | $N_W$ | $SEM_{N_W}$ | $d_l$<br>(Å) | $SEM_{d_l}$ | $V(d_l)$<br>(V) | $SEM_{V(d_l)}$ |
|--------------|-------------------------------|-----------------------------|---------------------------|-------------------------------------------|-------|-------------|--------------|-------------|-----------------|----------------|
| 10           | -0.02550                      | 0.00714                     | -0.05314                  | -14.50                                    | 78    | 4           | 7.287        | 0.408       | -1.13482        | 0.36844        |
| 20           | -0.00994                      | 0.00482                     | -0.02071                  | -5.65                                     | 75    | 6           | 6.922        | 0.311       | -0.42161        | 0.19157        |
| 30           | -0.01044                      | 0.00490                     | -0.02176                  | -5.94                                     | 75    | 3           | 6.824        | 0.221       | -0.38711        | 0.17606        |
| 40           | -0.01210                      | 0.00685                     | -0.02522                  | -6.88                                     | 69    | 4           | 6.662        | 0.318       | -0.40377        | 0.25364        |
| 50           | -0.02202                      | 0.00604                     | -0.04588                  | -12.52                                    | 77    | 5           | 6.960        | 0.294       | -0.82002        | 0.23649        |
| 60           | -0.02023                      | 0.00785                     | -0.04216                  | -11.51                                    | 76    | 6           | 6.485        | 0.258       | -0.74897        | 0.27251        |
| 70           | -0.01481                      | 0.00510                     | -0.03086                  | -8.42                                     | 75    | 4           | 5.770        | 5.770       | -0.49182        | 0.16651        |
| 80           | -0.01428                      | 0.00526                     | -0.02976                  | -8.12                                     | 68    | 3           | 6.173        | 6.173       | -0.50103        | 0.18787        |
| 90           | -0.01108                      | 0.00517                     | -0.02308                  | -6.30                                     | 77    | 4           | 6.194        | 0.297       | -0.35963        | 0.16979        |
| 100          | -0.01098                      | 0.00461                     | -0.02288                  | -6.25                                     | 74    | 5           | 6.189        | 0.308       | -0.42537        | 0.18534        |
| 110          | -0.00987                      | 0.00717                     | -0.02056                  | -5.61                                     | 77    | 4           | 5.910        | 0.385       | -0.35972        | 0.24651        |
| 120          | -0.00278                      | 0.00722                     | -0.00580                  | -1.58                                     | 75    | 5           | 5.838        | 0.259       | -0.06186        | 0.22898        |
| 130          | 0.00240                       | 0.00375                     | 0.00501                   | 1.37                                      | 73    | 2           | 5.381        | 0.157       | 0.08244         | 0.11618        |
| 140          | 0.00461                       | 0.00745                     | 0.00960                   | 2.62                                      | 69    | 3           | 4.980        | 0.261       | 0.16333         | 0.20137        |

Table S9: Results for Layer 5 at  $T_g = 150K$ .

| $T_s$<br>(K) | $\langle\mu_z\rangle$<br>(eÅ) | $SEM_{\langle\mu_z\rangle}$ | $\langle\mu_z\rangle/\mu$ | $E_{cal}$<br>( $\times 10^{+8} Vm^{-1}$ ) | $N_W$ | $SEM_{N_W}$ | $d_l$<br>(Å) | $SEM_{d_l}$ | $V(d_l)$<br>(V) | $SEM_{V(d_l)}$ |
|--------------|-------------------------------|-----------------------------|---------------------------|-------------------------------------------|-------|-------------|--------------|-------------|-----------------|----------------|
| 10           | -0.01274                      | 0.00746                     | -0.02654                  | -7.24                                     | 83    | 7           | 7.287        | 0.408       | -0.58949        | 0.33050        |
| 20           | -0.03030                      | 0.00625                     | -0.06313                  | -17.23                                    | 56    | 9           | 6.922        | 0.311       | -1.14255        | 0.23615        |
| 30           | -0.01853                      | 0.00350                     | -0.03862                  | -10.54                                    | 65    | 4           | 6.824        | 0.221       | -0.66472        | 0.13279        |
| 40           | -0.01402                      | 0.00592                     | -0.02921                  | -7.97                                     | 73    | 7           | 6.662        | 0.318       | -0.49675        | 0.22542        |
| 50           | -0.02060                      | 0.00549                     | -0.04293                  | -11.72                                    | 61    | 5           | 6.960        | 0.294       | -0.82858        | 0.22495        |
| 60           | -0.01059                      | 0.00576                     | -0.02207                  | -6.02                                     | 61    | 4           | 6.485        | 0.258       | -0.32755        | 0.21739        |
| 70           | -0.01742                      | 0.00354                     | -0.03630                  | -9.91                                     | 62    | 4           | 5.770        | 5.770       | -0.56167        | 0.11179        |
| 80           | -0.00683                      | 0.00385                     | -0.01423                  | -3.88                                     | 59    | 3           | 6.173        | 6.173       | -0.21586        | 0.13376        |
| 90           | -0.00742                      | 0.00726                     | -0.01547                  | -4.22                                     | 54    | 4           | 6.194        | 0.297       | -0.19663        | 0.25134        |
| 100          | -0.01892                      | 0.00691                     | -0.03942                  | -10.76                                    | 52    | 5           | 6.189        | 0.308       | -0.59440        | 0.22199        |
| 110          | -0.00792                      | 0.00946                     | -0.01650                  | -4.50                                     | 55    | 7           | 5.910        | 0.385       | -0.37416        | 0.28824        |
| 120          | 0.00460                       | 0.00629                     | 0.00958                   | 2.61                                      | 58    | 4           | 5.838        | 0.259       | 0.19566         | 0.21179        |
| 130          | 0.00226                       | 0.00419                     | 0.00472                   | 1.29                                      | 58    | 3           | 5.381        | 0.157       | 0.09306         | 0.13280        |
| 140          | 0.01889                       | 0.00388                     | 0.03935                   | 10.74                                     | 52    | 3           | 4.980        | 0.261       | 0.54564         | 0.12083        |

Table S10: Results for Layer 6 at  $T_g = 150K$ .

| $T_s$<br>(K) | $\langle\mu_z\rangle$<br>(eÅ) | $SEM_{\langle\mu_z\rangle}$ | $\langle\mu_z\rangle/\mu$ | $E_{cal}$<br>( $\times 10^{+8} Vm^{-1}$ ) | $N_W$ | $SEM_{N_W}$ | $d_l$<br>(Å) | $SEM_{d_l}$ | $V(d_l)$<br>(V) | $SEM_{V(d_l)}$ |
|--------------|-------------------------------|-----------------------------|---------------------------|-------------------------------------------|-------|-------------|--------------|-------------|-----------------|----------------|
| 10           | -0.03734                      | 0.00462                     | -0.07780                  | -21.23                                    | 41    | 4           | 7.287        | 0.408       | -1.60041        | 0.24376        |
| 20           | -0.01889                      | 0.00935                     | -0.03936                  | -10.74                                    | 27    | 3           | 6.922        | 0.311       | -0.73176        | 0.35389        |
| 30           | -0.02613                      | 0.00546                     | -0.05444                  | -14.86                                    | 36    | 2           | 6.824        | 0.221       | -0.96718        | 0.20857        |
| 40           | -0.01875                      | 0.01080                     | -0.03908                  | -10.67                                    | 37    | 4           | 6.662        | 0.318       | -0.72362        | 0.39414        |
| 50           | -0.01708                      | 0.01251                     | -0.03558                  | -9.71                                     | 30    | 4           | 6.960        | 0.294       | -0.68107        | 0.47928        |
| 60           | -0.03068                      | 0.01132                     | -0.06392                  | -17.44                                    | 37    | 6           | 6.485        | 0.258       | -1.02768        | 0.40251        |
| 70           | -0.03189                      | 0.01127                     | -0.06644                  | -18.13                                    | 27    | 3           | 5.770        | 5.770       | -1.10021        | 0.38281        |
| 80           | -0.02050                      | 0.00476                     | -0.04271                  | -11.66                                    | 30    | 2           | 6.173        | 6.173       | -0.74372        | 0.16845        |
| 90           | -0.01590                      | 0.00960                     | -0.03314                  | -9.04                                     | 30    | 3           | 6.194        | 0.297       | -0.51416        | 0.33005        |
| 100          | -0.01654                      | 0.00752                     | -0.03447                  | -9.41                                     | 27    | 3           | 6.189        | 0.308       | -0.53303        | 0.23928        |
| 110          | -0.01635                      | 0.01094                     | -0.03407                  | -9.30                                     | 27    | 3           | 5.910        | 0.385       | -0.51555        | 0.28657        |
| 120          | -0.01846                      | 0.00909                     | -0.03845                  | -10.50                                    | 25    | 2           | 5.838        | 0.259       | -0.63651        | 0.32920        |
| 130          | -0.00148                      | 0.00753                     | -0.00308                  | -0.84                                     | 24    | 2           | 5.381        | 0.157       | 0.00629         | 0.24203        |
| 140          | 0.00296                       | 0.00802                     | 0.00617                   | 1.69                                      | 23    | 2           | 4.980        | 0.261       | 0.12603         | 0.23794        |

Table S11: Results for Layer 1 at  $T_g = 300K$ .

| $T_s$<br>(K) | $\langle\mu_z\rangle$<br>(eÅ) | $SEM_{\langle\mu_z\rangle}$ | $\langle\mu_z\rangle/\mu$ | $E_{cal}$<br>( $\times 10^{+8} Vm^{-1}$ ) | $N_W$ | $SEM_{N_W}$ | $d_l$<br>(Å) | $SEM_{d_l}$ | $V(d_l)$<br>(V) | $SEM_{V(d_l)}$ |
|--------------|-------------------------------|-----------------------------|---------------------------|-------------------------------------------|-------|-------------|--------------|-------------|-----------------|----------------|
| 10           | -0.00620                      | 0.00323                     | -0.01292                  | -3.53                                     | 151   | 5           | 6.563        | 0.358       | -0.25586        | 0.12285        |
| 20           | -0.00469                      | 0.00227                     | -0.00977                  | -2.67                                     | 176   | 5           | 6.515        | 0.248       | -0.18874        | 0.09180        |
| 30           | -0.00126                      | 0.00148                     | -0.00262                  | -0.71                                     | 165   | 3           | 5.779        | 0.201       | 0.10930         | 0.04666        |
| 40           | -0.00206                      | 0.00287                     | -0.00429                  | -1.17                                     | 171   | 6           | 5.859        | 0.277       | -0.08783        | 0.09923        |
| 50           | 0.00825                       | 0.00232                     | 0.01720                   | 4.69                                      | 163   | 9           | 5.637        | 0.309       | 0.24647         | 0.07008        |
| 60           | 0.00421                       | 0.00270                     | 0.00878                   | 2.40                                      | 170   | 7           | 5.543        | 0.258       | 0.13815         | 0.08260        |
| 70           | 0.00655                       | 0.00289                     | 0.01366                   | 3.73                                      | 171   | 9           | 5.394        | 0.303       | 0.19329         | 0.09458        |
| 80           | 0.00660                       | 0.00178                     | 0.01374                   | 3.75                                      | 173   | 3           | 5.628        | 0.150       | 0.19771         | 0.02515        |
| 90           | 0.01025                       | 0.00222                     | 0.02136                   | 5.83                                      | 173   | 7           | 5.043        | 0.286       | 0.30025         | 0.07184        |
| 100          | 0.00881                       | 0.00202                     | 0.01835                   | 5.01                                      | 162   | 6           | 5.208        | 0.309       | 0.25241         | 0.05734        |
| 110          | 0.00960                       | 0.00177                     | 0.02001                   | 5.46                                      | 168   | 6           | 5.009        | 0.136       | 0.26899         | 0.04823        |
| 120          | 0.01031                       | 0.00306                     | 0.02148                   | 5.86                                      | 169   | 4           | 5.110        | 0.236       | 0.28861         | 0.08843        |
| 130          | 0.01270                       | 0.00152                     | 0.02645                   | 7.22                                      | 171   | 3           | 5.029        | 0.121       | 0.35072         | 0.04403        |
| 140          | 0.00990                       | 0.00311                     | 0.02062                   | 5.63                                      | 171   | 6           | 4.922        | 0.161       | 0.27225         | 0.08429        |

Table S12: Results for Layer 2 at  $T_g = 300K$ .

| $T_s$<br>(K) | $\langle\mu_z\rangle$<br>(eÅ) | $SEM_{\langle\mu_z\rangle}$ | $\langle\mu_z\rangle/\mu$ | $E_{cal}$<br>( $\times 10^{+8} Vm^{-1}$ ) | $N_W$ | $SEM_{N_W}$ | $d_l$<br>(Å) | $SEM_{d_l}$ | $V(d_l)$<br>(V) | $SEM_{V(d_l)}$ |
|--------------|-------------------------------|-----------------------------|---------------------------|-------------------------------------------|-------|-------------|--------------|-------------|-----------------|----------------|
| 10           | -0.01876                      | 0.00368                     | -0.03910                  | -10.67                                    | 92    | 8           | 6.563        | 0.358       | -0.71589        | 0.15842        |
| 20           | -0.02218                      | 0.00462                     | -0.04622                  | -12.61                                    | 81    | 5           | 6.515        | 0.248       | -0.80217        | 0.16797        |
| 30           | -0.01911                      | 0.00195                     | -0.03981                  | -10.87                                    | 89    | 3           | 5.779        | 0.201       | -0.45264        | 0.06884        |
| 40           | -0.01816                      | 0.00546                     | -0.03785                  | -10.33                                    | 101   | 5           | 5.859        | 0.277       | -0.60304        | 0.18184        |
| 50           | -0.01226                      | 0.00707                     | -0.02555                  | -6.97                                     | 99    | 4           | 5.637        | 0.309       | -0.32104        | 0.21695        |
| 60           | -0.01653                      | 0.00400                     | -0.03444                  | -9.40                                     | 105   | 5           | 5.543        | 0.258       | -0.55432        | 0.14564        |
| 70           | -0.01028                      | 0.00304                     | -0.02143                  | -5.85                                     | 95    | 5           | 5.394        | 0.303       | -0.32705        | 0.09571        |
| 80           | -0.01472                      | 0.00335                     | -0.03068                  | -8.37                                     | 99    | 3           | 5.628        | 0.150       | -0.40953        | 0.13542        |
| 90           | -0.01358                      | 0.00426                     | -0.02830                  | -7.73                                     | 94    | 3           | 5.043        | 0.286       | -0.39594        | 0.13815        |
| 100          | -0.01333                      | 0.00514                     | -0.02776                  | -7.58                                     | 98    | 4           | 5.208        | 0.309       | -0.33433        | 0.16524        |
| 110          | -0.00989                      | 0.00536                     | -0.02061                  | -5.62                                     | 100   | 5           | 5.009        | 0.136       | -0.28010        | 0.15466        |
| 120          | -0.00031                      | 0.00571                     | -0.00065                  | 0.18                                      | 97    | 5           | 5.110        | 0.236       | -0.00240        | 0.18167        |
| 130          | -0.00857                      | 0.00268                     | -0.01786                  | -4.87                                     | 101   | 2           | 5.029        | 0.121       | -0.43760        | 0.06667        |
| 140          | -0.01043                      | 0.00463                     | -0.02174                  | -5.93                                     | 96    | 5           | 4.922        | 0.161       | -0.28302        | 0.14305        |

Table S13: Results for Layer 3 at  $T_g = 300K$ .

| $T_s$<br>(K) | $\langle\mu_z\rangle$<br>(eÅ) | $SEM_{\langle\mu_z\rangle}$ | $\langle\mu_z\rangle/\mu$ | $E_{cal}$<br>( $\times 10^{+8} Vm^{-1}$ ) | $N_W$ | $SEM_{N_W}$ | $d_l$<br>(Å) | $SEM_{d_l}$ | $V(d_l)$<br>(V) | $SEM_{V(d_l)}$ |
|--------------|-------------------------------|-----------------------------|---------------------------|-------------------------------------------|-------|-------------|--------------|-------------|-----------------|----------------|
| 10           | -0.02728                      | 0.00516                     | -0.05684                  | -15.51                                    | 85    | 3           | 6.563        | 0.358       | -1.04882        | 0.22777        |
| 20           | -0.01687                      | 0.00580                     | -0.03515                  | -9.59                                     | 69    | 7           | 6.515        | 0.248       | -0.62190        | 0.21594        |
| 30           | -0.02222                      | 0.00199                     | -0.04629                  | -12.63                                    | 78    | 3           | 5.779        | 0.201       | -0.70777        | 0.05666        |
| 40           | -0.01483                      | 0.00375                     | -0.03090                  | -8.43                                     | 84    | 6           | 5.859        | 0.277       | -0.49775        | 0.12263        |
| 50           | -0.01679                      | 0.00787                     | -0.03499                  | -9.55                                     | 85    | 4           | 5.637        | 0.309       | -0.51652        | 0.25291        |
| 60           | -0.01637                      | 0.00489                     | -0.03411                  | -9.31                                     | 83    | 5           | 5.543        | 0.258       | -0.52225        | 0.16754        |
| 70           | -0.02202                      | 0.01050                     | -0.04588                  | -12.52                                    | 78    | 6           | 5.394        | 0.303       | -0.68908        | 0.35994        |
| 80           | -0.00703                      | 0.00273                     | -0.01465                  | -3.99                                     | 80    | 2           | 5.628        | 0.150       | -0.22828        | 0.09005        |
| 90           | -0.00979                      | 0.00469                     | -0.02041                  | -5.57                                     | 82    | 5           | 5.043        | 0.286       | -0.28382        | 0.15004        |
| 100          | -0.00909                      | 0.00494                     | -0.01894                  | -5.17                                     | 83    | 3           | 5.208        | 0.309       | -0.23454        | 0.15367        |
| 110          | -0.00601                      | 0.00497                     | -0.01252                  | -3.42                                     | 83    | 3           | 5.009        | 0.136       | -0.17897        | 0.15326        |
| 120          | -0.00479                      | 0.00637                     | -0.00998                  | -2.72                                     | 77    | 3           | 5.110        | 0.236       | -0.11114        | 0.18978        |
| 130          | -0.00498                      | 0.00387                     | -0.01038                  | -2.83                                     | 83    | 3           | 5.029        | 0.121       | -0.15507        | 0.12017        |
| 140          | -0.00406                      | 0.00494                     | -0.00846                  | -2.31                                     | 79    | 4           | 4.922        | 0.161       | -0.12575        | 0.14225        |

Table S14: Results for Layer 4 at  $T_g = 300K$ .

| $T_s$<br>(K) | $\langle\mu_z\rangle$<br>(eÅ) | $SEM_{\langle\mu_z\rangle}$ | $\langle\mu_z\rangle/\mu$ | $E_{cal}$<br>( $\times 10^{+8} Vm^{-1}$ ) | $N_W$ | $SEM_{N_W}$ | $d_l$<br>(Å) | $SEM_{d_l}$ | $V(d_l)$<br>(V) | $SEM_{V(d_l)}$ |
|--------------|-------------------------------|-----------------------------|---------------------------|-------------------------------------------|-------|-------------|--------------|-------------|-----------------|----------------|
| 10           | -0.02647                      | 0.00347                     | -0.05516                  | -15.05                                    | 74    | 6           | 6.563        | 0.358       | -1.00595        | 0.14989        |
| 20           | -0.01306                      | 0.00500                     | -0.02721                  | -7.43                                     | 72    | 3           | 6.515        | 0.248       | -0.48486        | 0.18039        |
| 30           | -0.01530                      | 0.00335                     | -0.03188                  | -8.70                                     | 74    | 2           | 5.779        | 0.201       | -0.49489        | 0.09619        |
| 40           | -0.01949                      | 0.00670                     | -0.04061                  | -11.08                                    | 65    | 5           | 5.859        | 0.277       | -0.70978        | 0.24255        |
| 50           | -0.01512                      | 0.00459                     | -0.03150                  | -8.60                                     | 75    | 4           | 5.637        | 0.309       | -0.47258        | 0.14684        |
| 60           | -0.01754                      | 0.00688                     | -0.03654                  | -9.97                                     | 71    | 5           | 5.543        | 0.258       | -0.53385        | 0.21079        |
| 70           | -0.01787                      | 0.00810                     | -0.03724                  | -10.16                                    | 72    | 4           | 5.394        | 0.303       | -0.52963        | 0.25272        |
| 80           | -0.00854                      | 0.00451                     | -0.01778                  | -4.85                                     | 70    | 2           | 5.628        | 0.150       | -0.26269        | 0.15565        |
| 90           | -0.02015                      | 0.00449                     | -0.04198                  | -11.46                                    | 71    | 3           | 5.043        | 0.286       | -0.58919        | 0.11894        |
| 100          | -0.01784                      | 0.00511                     | -0.03718                  | -10.15                                    | 75    | 3           | 5.208        | 0.309       | -0.45789        | 0.13204        |
| 110          | 0.00494                       | -0.03008                    | -0.03008                  | -8.21                                     | 72    | 5           | 5.009        | 0.136       | -0.40062        | 0.13149        |
| 120          | -0.00727                      | 0.00335                     | -0.01516                  | -4.14                                     | 72    | 4           | 5.110        | 0.236       | -0.19449        | 0.07977        |
| 130          | -0.00663                      | 0.00260                     | -0.01382                  | -3.77                                     | 70    | 2           | 5.029        | 0.121       | -0.18851        | 0.07331        |
| 140          | -0.00177                      | 0.00725                     | -0.00369                  | -1.01                                     | 72    | 4           | 4.922        | 0.161       | -0.06107        | 0.20604        |

Table S15: Results for Layer 5 at  $T_g = 300K$ .

| $T_s$<br>(K) | $\langle\mu_z\rangle$<br>(eÅ) | $SEM_{\langle\mu_z\rangle}$ | $\langle\mu_z\rangle/\mu$ | $E_{cal}$<br>( $\times 10^{+8} Vm^{-1}$ ) | $N_W$ | $SEM_{N_W}$ | $d_l$<br>(Å) | $SEM_{d_l}$ | $V(d_l)$<br>(V) | $SEM_{V(d_l)}$ |
|--------------|-------------------------------|-----------------------------|---------------------------|-------------------------------------------|-------|-------------|--------------|-------------|-----------------|----------------|
| 10           | -0.03813                      | 0.00742                     | -0.07945                  | -21.68                                    | 66    | 8           | 6.563        | 0.358       | -1.34684        | 0.24318        |
| 20           | -0.02301                      | 0.00692                     | -0.04794                  | -13.09                                    | 72    | 7           | 6.515        | 0.248       | -0.82356        | 0.22697        |
| 30           | -0.02092                      | 0.00382                     | -0.04359                  | -11.90                                    | 63    | 3           | 5.779        | 0.201       | -0.69487        | 0.12394        |
| 40           | -0.00905                      | 0.00331                     | -0.01886                  | -5.15                                     | 51    | 6           | 5.859        | 0.277       | -0.32659        | 0.11806        |
| 50           | -0.02367                      | 0.00571                     | -0.04932                  | -13.46                                    | 56    | 5           | 5.637        | 0.309       | -0.71419        | 0.16931        |
| 60           | -0.01421                      | 0.00703                     | -0.02961                  | -8.08                                     | 51    | 4           | 5.543        | 0.258       | -0.46393        | 0.21356        |
| 70           | -0.01183                      | 0.00657                     | -0.02466                  | -6.73                                     | 54    | 5           | 5.394        | 0.303       | -0.35807        | 0.20622        |
| 80           | -0.00794                      | 0.00504                     | -0.01654                  | -4.51                                     | 53    | 3           | 5.628        | 0.150       | -0.23902        | 0.16565        |
| 90           | -0.01258                      | 0.00681                     | -0.02622                  | -7.16                                     | 57    | 3           | 5.043        | 0.286       | -0.34725        | 0.21531        |
| 100          | -0.01324                      | 0.00931                     | -0.02759                  | -7.53                                     | 59    | 4           | 5.208        | 0.309       | -0.32347        | 0.27683        |
| 110          | -0.00938                      | 0.00481                     | -0.01954                  | -5.33                                     | 55    | 5           | 5.009        | 0.136       | -0.27780        | 0.14840        |
| 120          | -0.00263                      | 0.00714                     | -0.00547                  | -1.49                                     | 56    | 4           | 5.110        | 0.236       | -0.04438        | 0.17885        |
| 130          | -0.00874                      | 0.00340                     | -0.01822                  | -4.97                                     | 52    | 3           | 5.029        | 0.121       | -0.25351        | 0.09805        |
| 140          | -0.00589                      | 0.00706                     | -0.01228                  | -3.35                                     | 56    | 3           | 4.922        | 0.161       | -0.16474        | 0.22269        |

Table S16: Results for Layer 6 at  $T_g = 300K$ .

| $T_s$<br>(K) | $\langle\mu_z\rangle$<br>(eÅ) | $SEM_{\langle\mu_z\rangle}$ | $\langle\mu_z\rangle/\mu$ | $E_{cal}$<br>( $\times 10^{+8} Vm^{-1}$ ) | $N_W$ | $SEM_{N_W}$ | $d_l$<br>(Å) | $SEM_{d_l}$ | $V(d_l)$<br>(V) | $SEM_{V(d_l)}$ |
|--------------|-------------------------------|-----------------------------|---------------------------|-------------------------------------------|-------|-------------|--------------|-------------|-----------------|----------------|
| 10           | -0.05193                      | 0.00808                     | -0.10820                  | -29.53                                    | 33    | 3           | 6.563        | 0.358       | -1.97875        | 0.33216        |
| 20           | -0.03700                      | 0.00910                     | -0.07709                  | -21.04                                    | 30    | 3           | 6.515        | 0.248       | -1.37175        | 0.35143        |
| 30           | -0.03149                      | 0.00328                     | -0.06562                  | -17.91                                    | 31    | 1           | 5.779        | 0.201       | -0.95764        | 0.12880        |
| 40           | -0.01616                      | 0.00990                     | -0.03367                  | -9.19                                     | 27    | 4           | 5.859        | 0.277       | -0.55169        | 0.33576        |
| 50           | -0.00472                      | 0.01973                     | -0.00984                  | -2.69                                     | 22    | 3           | 5.637        | 0.309       | -0.14167        | 0.60411        |
| 60           | -0.01756                      | 0.01292                     | -0.03658                  | -9.98                                     | 21    | 1           | 5.543        | 0.258       | -0.63808        | 0.42067        |
| 70           | -0.00825                      | 0.00891                     | -0.01718                  | -4.69                                     | 30    | 3           | 5.394        | 0.303       | -0.17762        | 0.27992        |
| 80           | -0.01943                      | 0.00716                     | -0.04049                  | -11.05                                    | 26    | 2           | 5.628        | 0.150       | -0.55452        | 0.23193        |
| 90           | -0.00111                      | 0.01413                     | -0.00232                  | -0.63                                     | 24    | 3           | 5.043        | 0.286       | 0.00876         | 0.40814        |
| 100          | -0.02300                      | 0.00553                     | -0.04792                  | -13.08                                    | 24    | 2           | 5.208        | 0.309       | -0.71633        | 0.21722        |
| 110          | -0.01071                      | 0.01378                     | -0.02231                  | -6.09                                     | 22    | 3           | 5.009        | 0.136       | -0.33903        | 0.38649        |
| 120          | -0.01715                      | 0.01201                     | -0.03574                  | -9.75                                     | 29    | 4           | 5.110        | 0.236       | -0.52230        | 0.34660        |
| 130          | -0.02038                      | 0.00781                     | -0.04246                  | -11.59                                    | 23    | 1           | 5.029        | 0.121       | -0.57465        | 0.22471        |
| 140          | -0.01468                      | 0.01102                     | -0.03059                  | -8.35                                     | 27    | 2           | 4.922        | 0.161       | -0.41392        | 0.31909        |

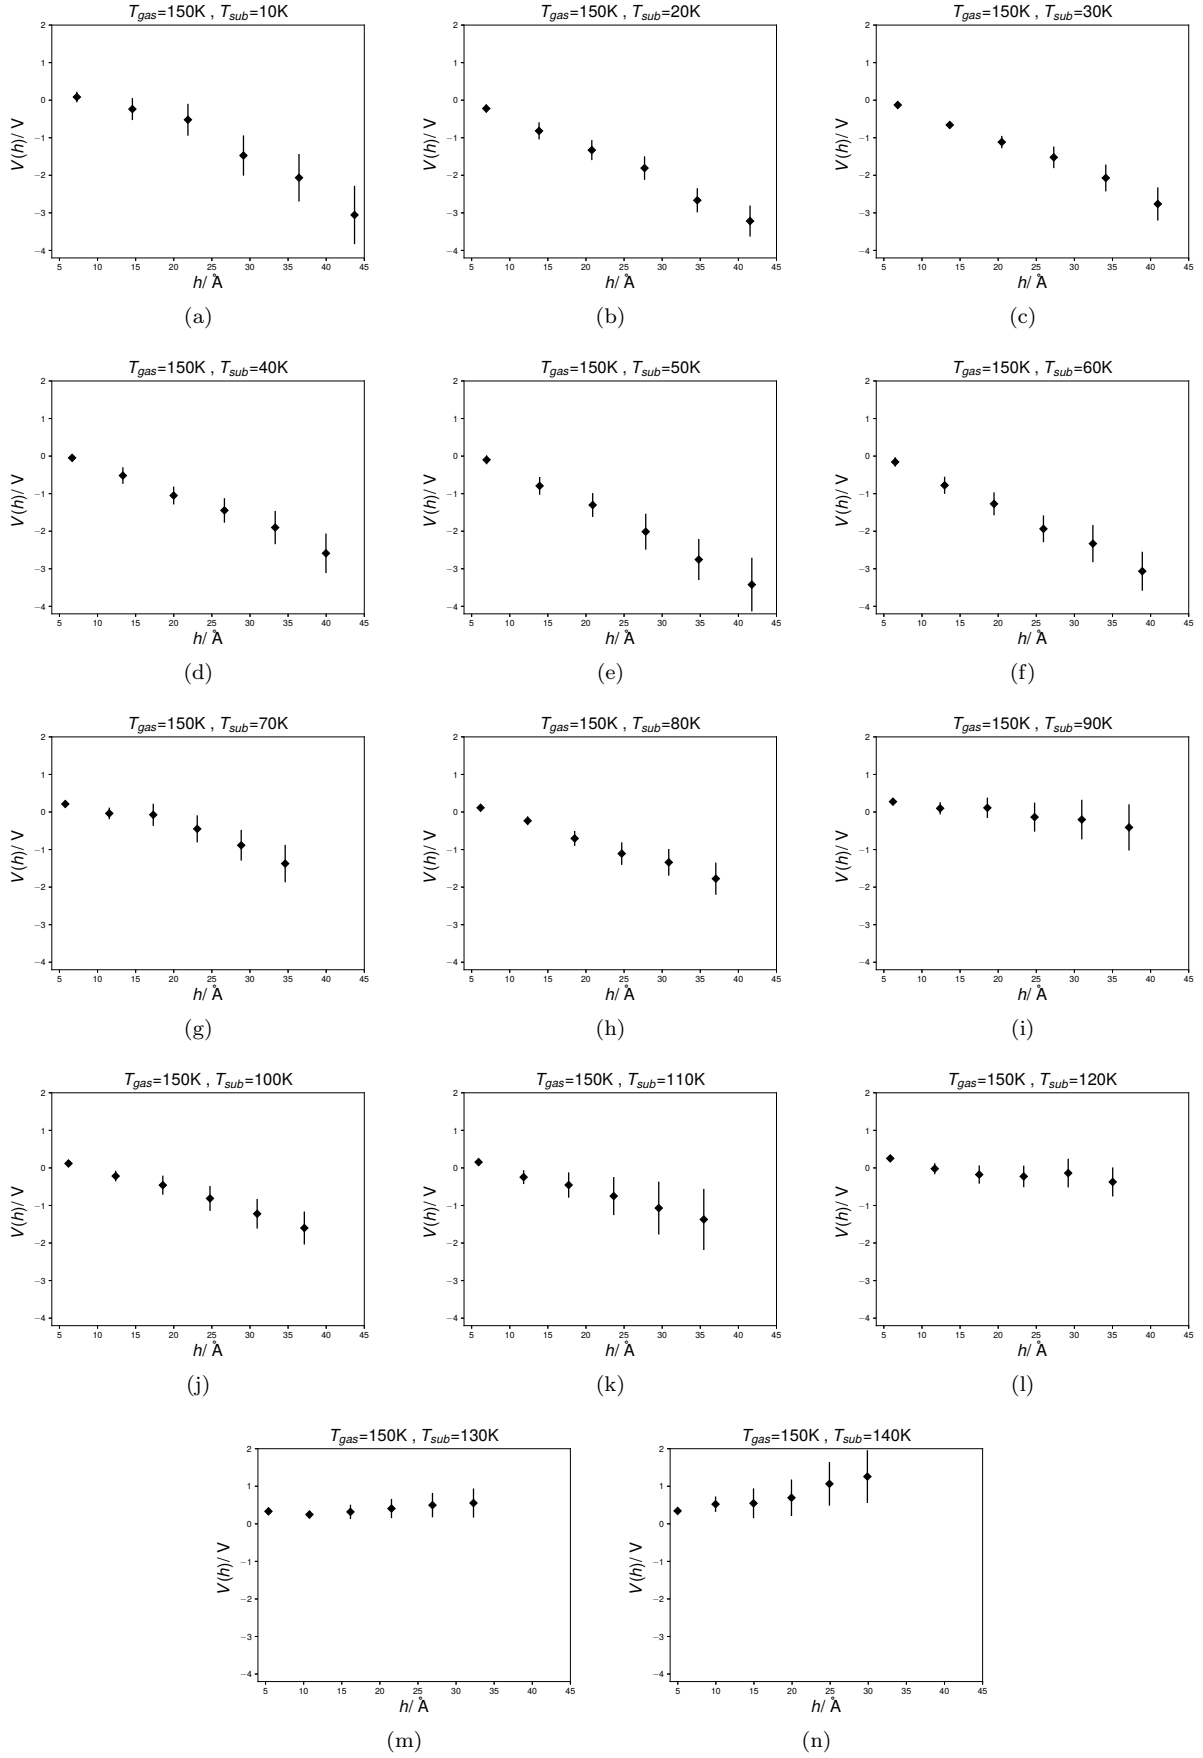

Figure S1: The height dependence of the potential  $V(h)$  at  $T_g=150 \text{ K}$  and  $T_s$  between 10 K and 140 K.



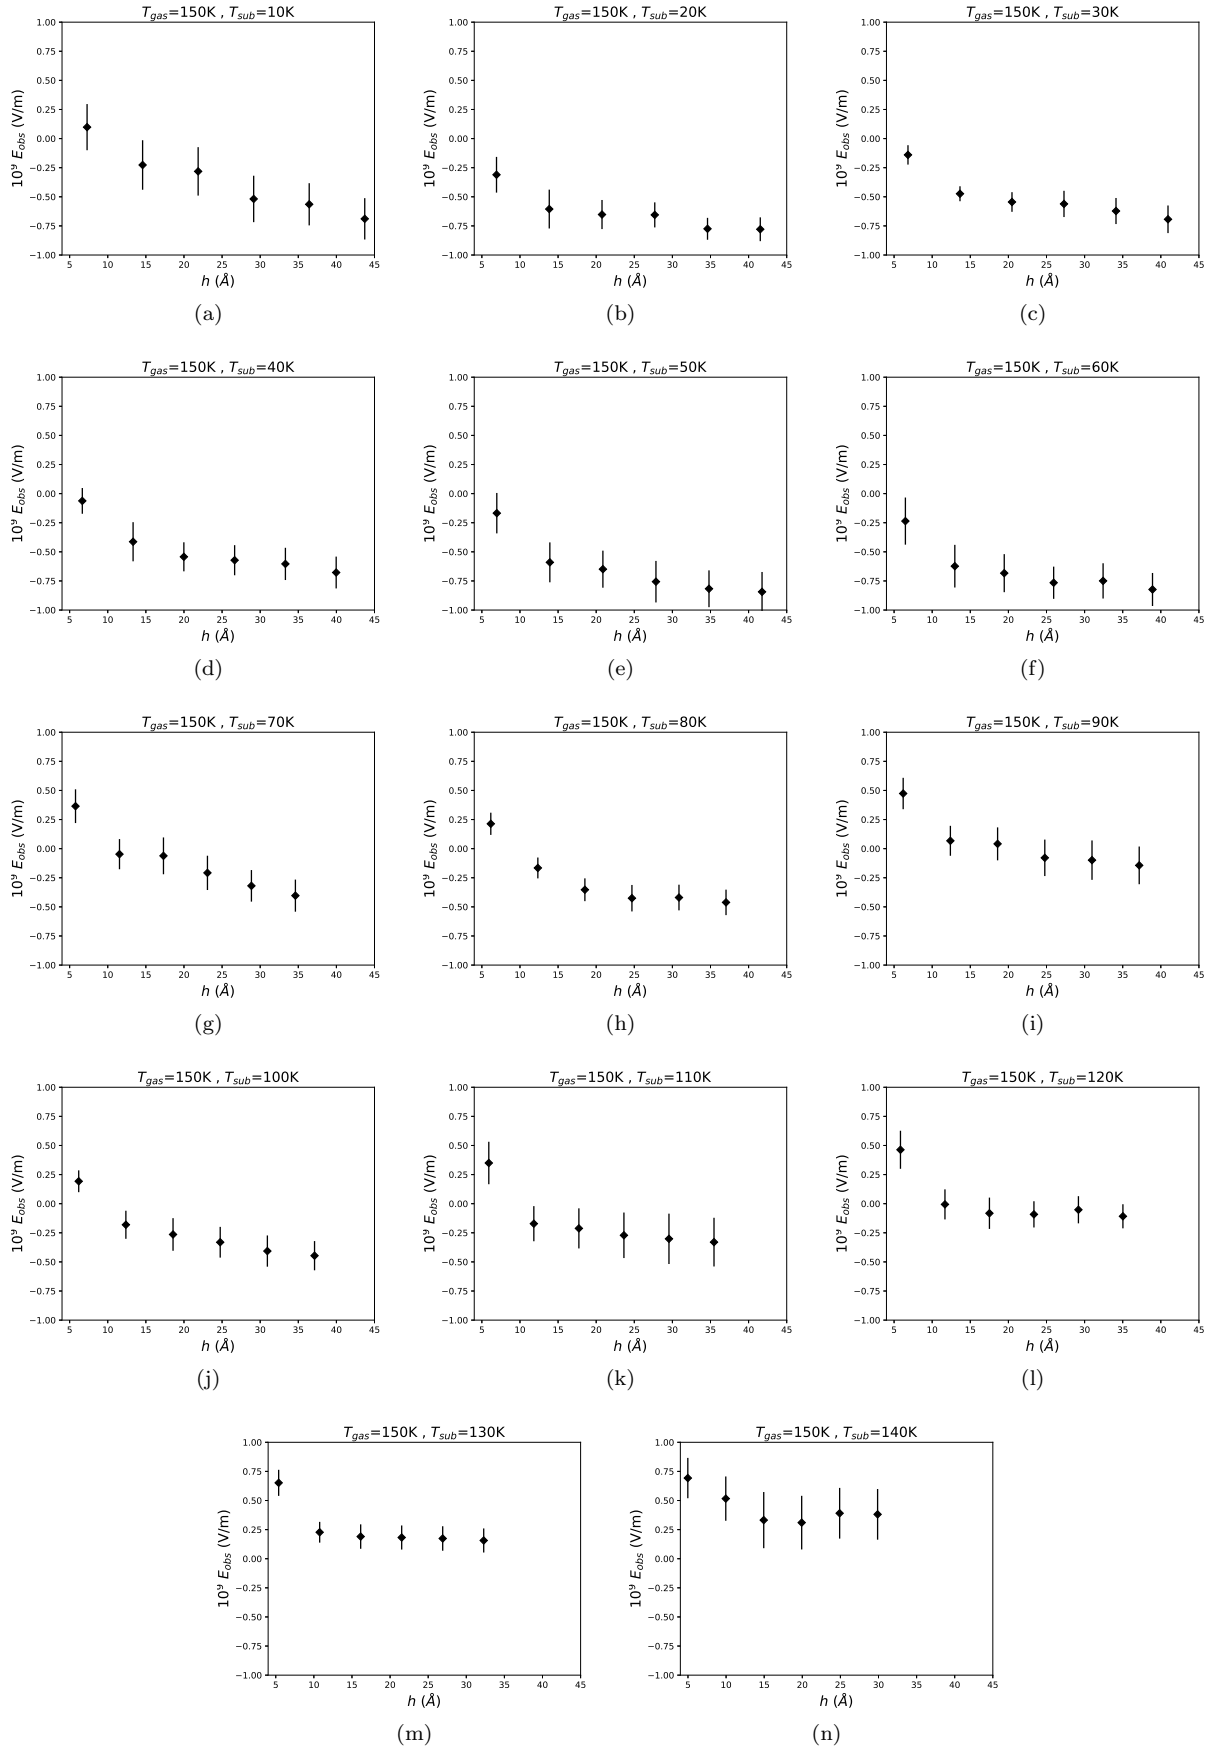

Figure S2: The height dependence of the electric field at  $T_g=150$  K and  $T_s$  between 10 K and 140 K.

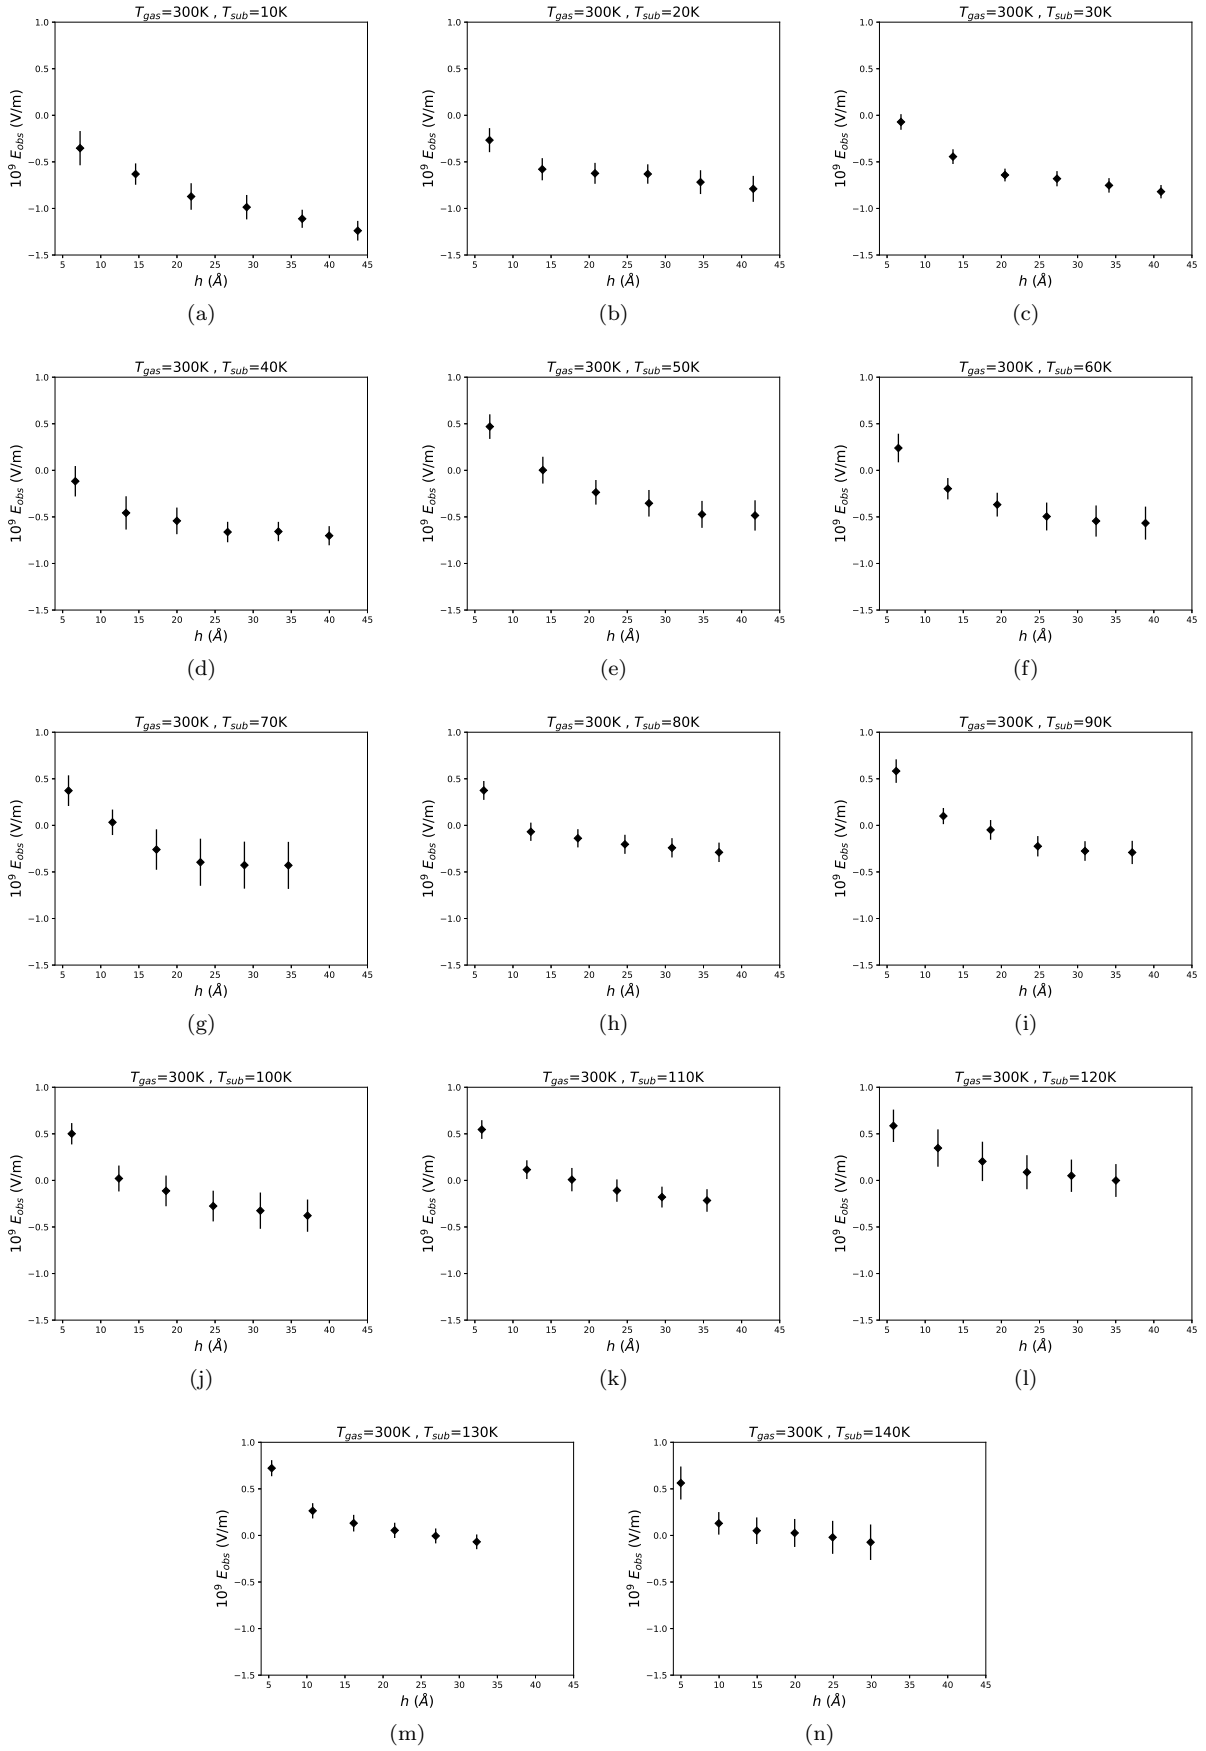

Figure S3: The height dependence of the electric field at  $T_g=150$  K and  $T_s$  between 10 K and 140 K.
